# Supplementary material for: Homoleptic and heteroleptic ketodiiminate zinc complexes for the ROP of cyclic l-lactide
Source: Royal Society of Chemistry journal article supplement (doi:10.1039/d3ra06529d), 2023-01-01
Supplement: d3ra06529d1.pdf [file d3ra06529d1.pdf]

## Supporting Information

### **Homoleptic and heteroleptic ketodiiminate zinc complexes for the ROP of cyclic *L*-Lactide**

*Eduard Glöckler, Leon Kapp, Christoph Wölper, Marcel Schumacher, André H. Gröschel, Stephan Schulz\**

## Content

### I. Spectroscopic Characterization

**Figures S1-S3.**  $^1\text{H}$ ,  $^{13}\text{C}$  NMR, and IR spectra of  $\text{L}^1\text{H}_2$ .

**Figures S4-S6.**  $^1\text{H}$ ,  $^{13}\text{C}$  NMR and IR spectra of  $\text{L}^2\text{H}_2$ .

**Figure S7.**  $^1\text{H}$  NMR spectrum of the reaction of  $\text{L}^1\text{H}_2$  with 2 eq. of  $\text{ZnCp}^*\text{Zn}$ .

**Figure S8.**  $^1\text{H}$  NMR spectrum of the reaction of  $\text{L}^1\text{H}_2$  with 2 eq. of  $\text{ZnCp}_2$ .

**Figure S9-S10.**  $^{13}\text{C}$  NMR and IR spectra of **1**.

**Figures S11-S13.**  $^1\text{H}$ ,  $^{13}\text{C}$  NMR and IR spectra of **2**.

**Figures S14-S16.**  $^1\text{H}$ ,  $^{13}\text{C}$  NMR and IR spectra of **3**.

### II. Crystallographic Details

**Table S1** Crystal data for compound **2** and **3**

### III. Polymerization Studies

**Figure S17.** MWDs of cPLA obtained by reaction of *L*-LA and **2** and **3**.

**Figure S18.** MWDs of cPLA obtained by reaction of *L*-LA and **2** (200:1+200+200).

**Figure S19.**  $^1\text{H}$  NMR (300 MHz,  $\text{C}_6\text{D}_6$ , 300 K) spectrum of cPLA obtained by reaction of *L*-LA and **2** in ratio [monomer]:[Zn] = 200:1 at 100 °C in toluene.

**Figure S20.** MALDI-ToF spectrum of cyclic-PLLA obtained by reaction of *L*-LA and **2** in ratio [monomer]:[Zn] = 50:1 at 100 °C in toluene.

**Figure S21.** IR spectrum of cyclic-PLLA obtained by reaction of *L*-LA and **2** in ratio [monomer]:[Zn] = 50:1 at 100 °C in toluene.

**Figure S22.** MALDI-ToF spectrum of linear PLLA obtained by reaction of *L*-LA and **3** in ratio [monomer]:[Zn] = 50:1 at 100 °C in toluene.

**Figure S23.** IR spectrum of linear PLLA obtained by reaction of *L*-LA and **3** in ratio [monomer]:[Zn] = 50:1 at 100 °C in toluene.

## I. Spectroscopic Characterization

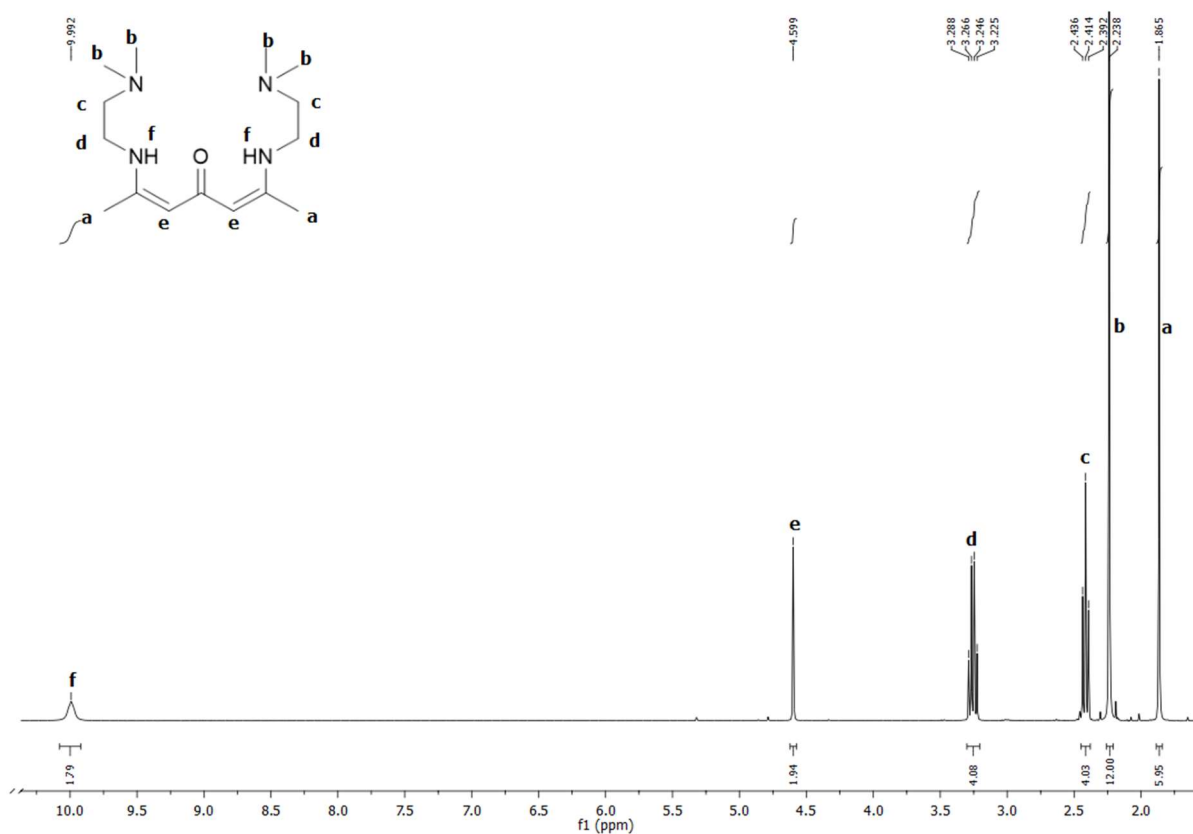

Figure S1.  $^1H$  NMR (300 MHz,  $CD_2Cl_2$ , 25 °C) spectrum of  $L^1H_2$ .

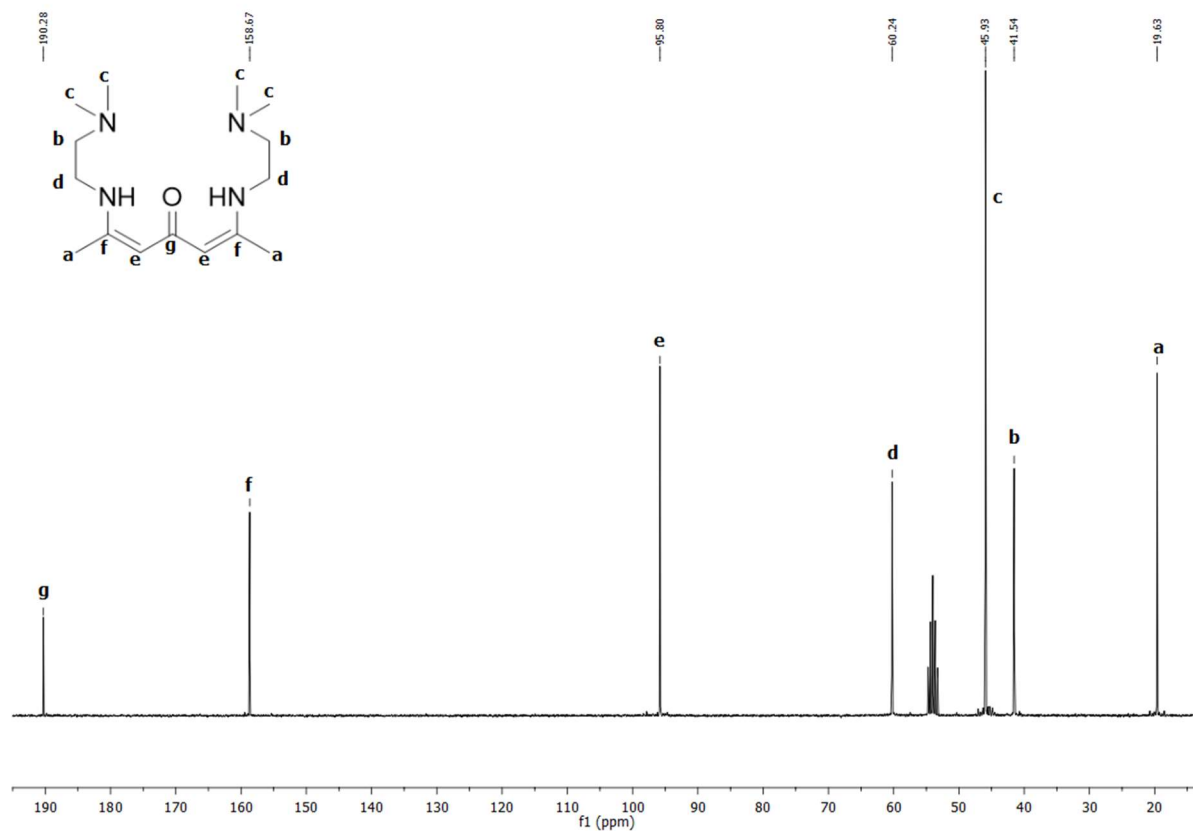

Figure S2.  $^{13}C$  NMR (75 MHz,  $CD_2Cl_2$ , 25 °C) spectrum of  $L^1H_2$ .

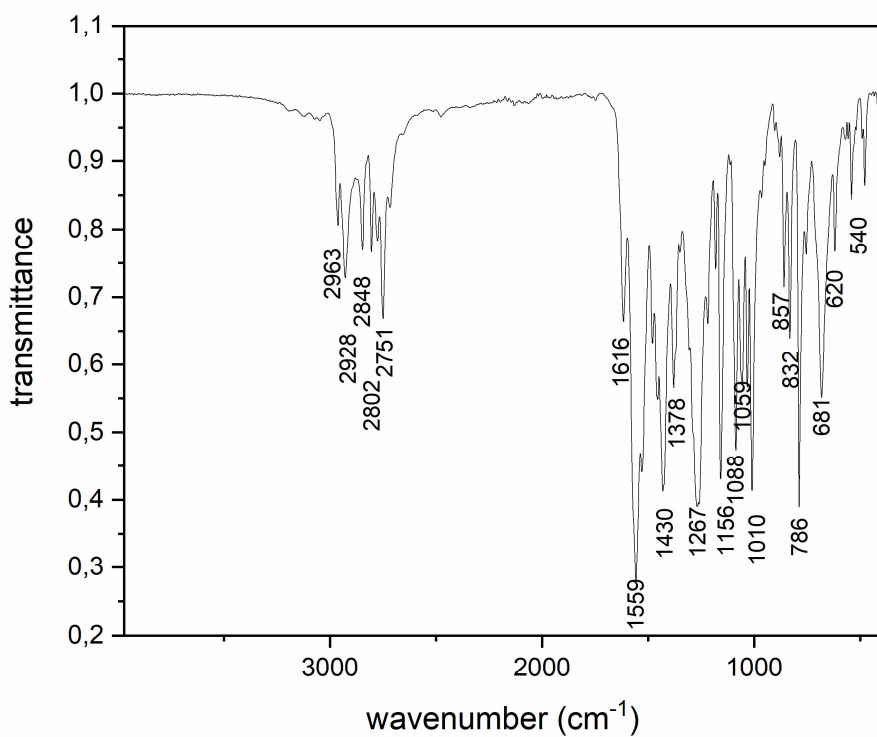

**Figure S3.** IR spectrum of  $L^1H_2$ .

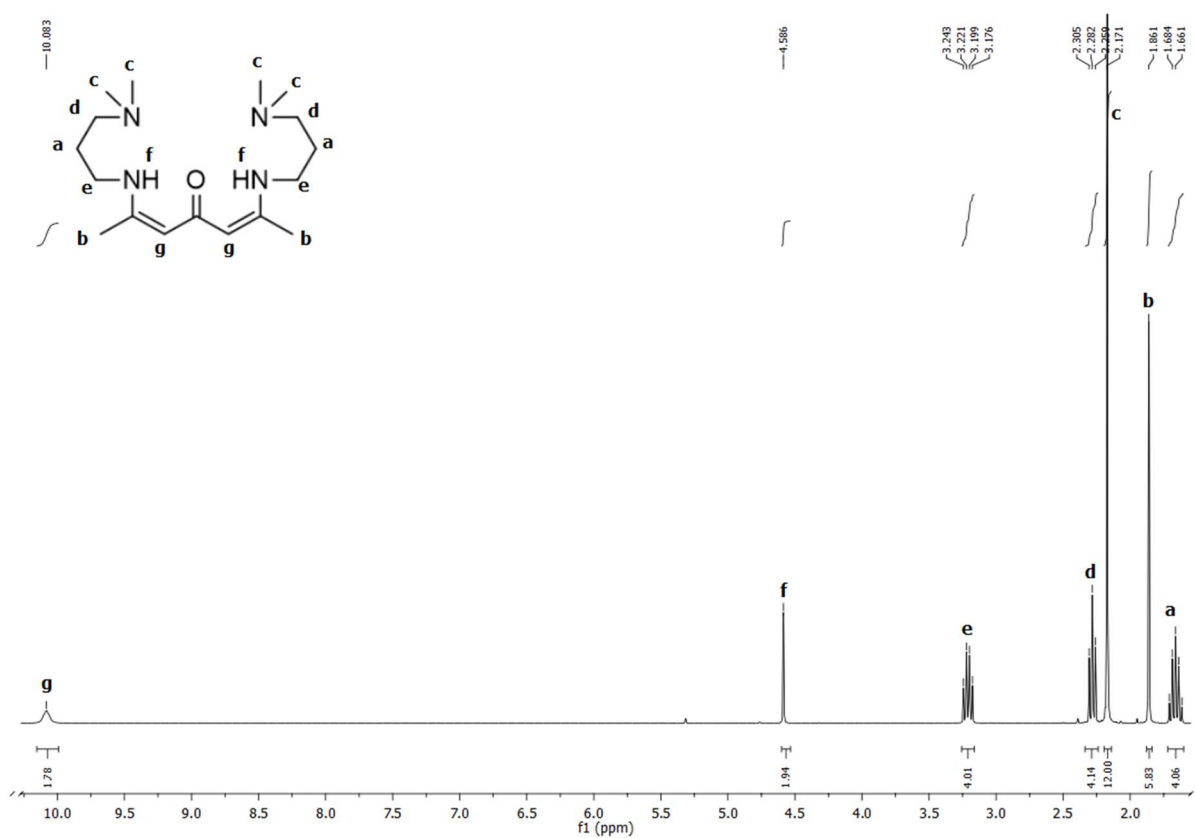

**Figure S4.**  $^1H$  NMR (300 MHz,  $CD_2Cl_2$ , 25  $^{\circ}C$ ) spectrum of  $L^2H_2$ .

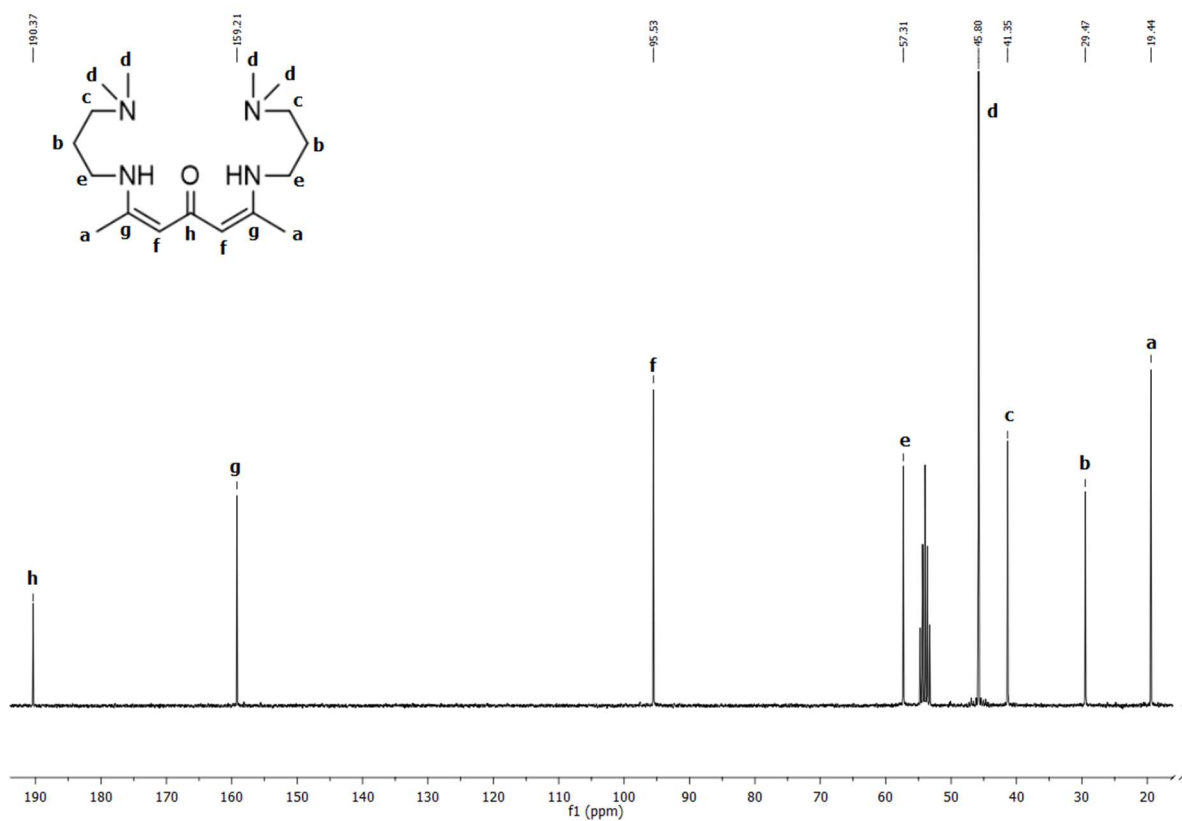

Figure S5.  $^{13}C$  NMR (75 MHz,  $CD_2Cl_2$ , 25 °C) spectrum of  $L^2H_2$ .

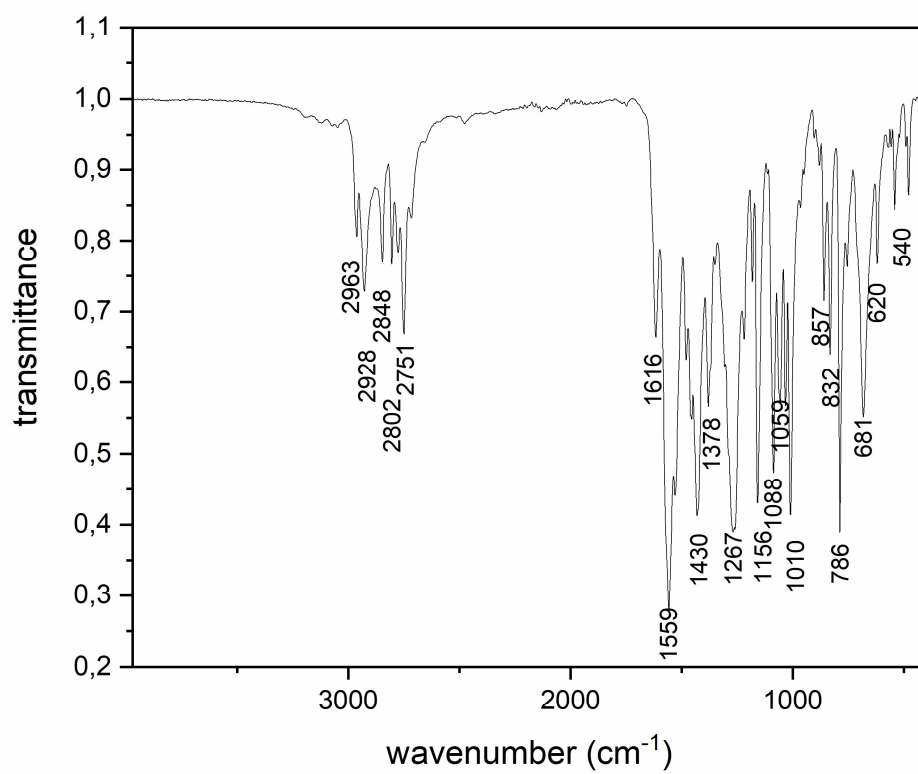

Figure S6. IR spectrum of  $L^1H_2$ .

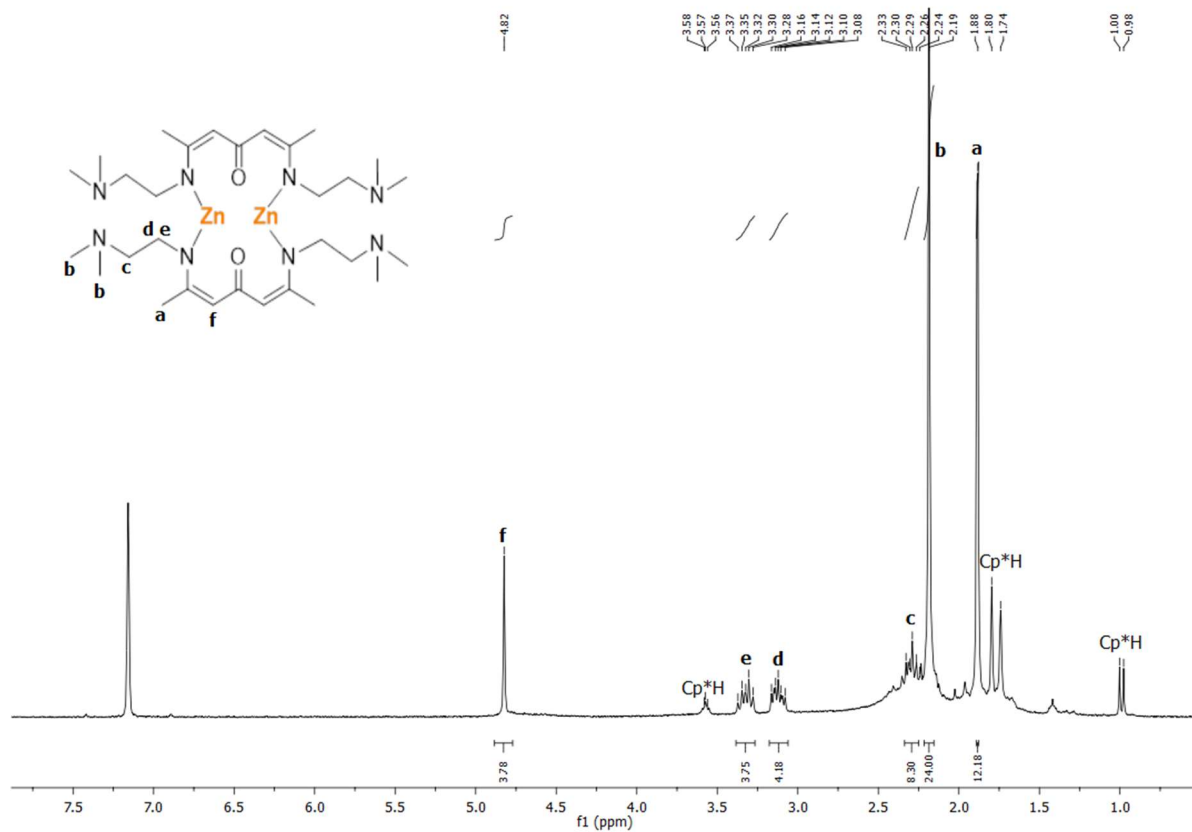

**Figure S7.**  $^1\text{H}$  NMR (300 MHz,  $\text{CD}_2\text{Cl}_2$ , 25  $^\circ\text{C}$ ) spectrum of the reaction of  $\text{L}^1\text{H}_2$  with 2 eq. of  $\text{ZnCp}^*_2$  yielding compound 1 and  $\text{Cp}^*\text{H}$ .

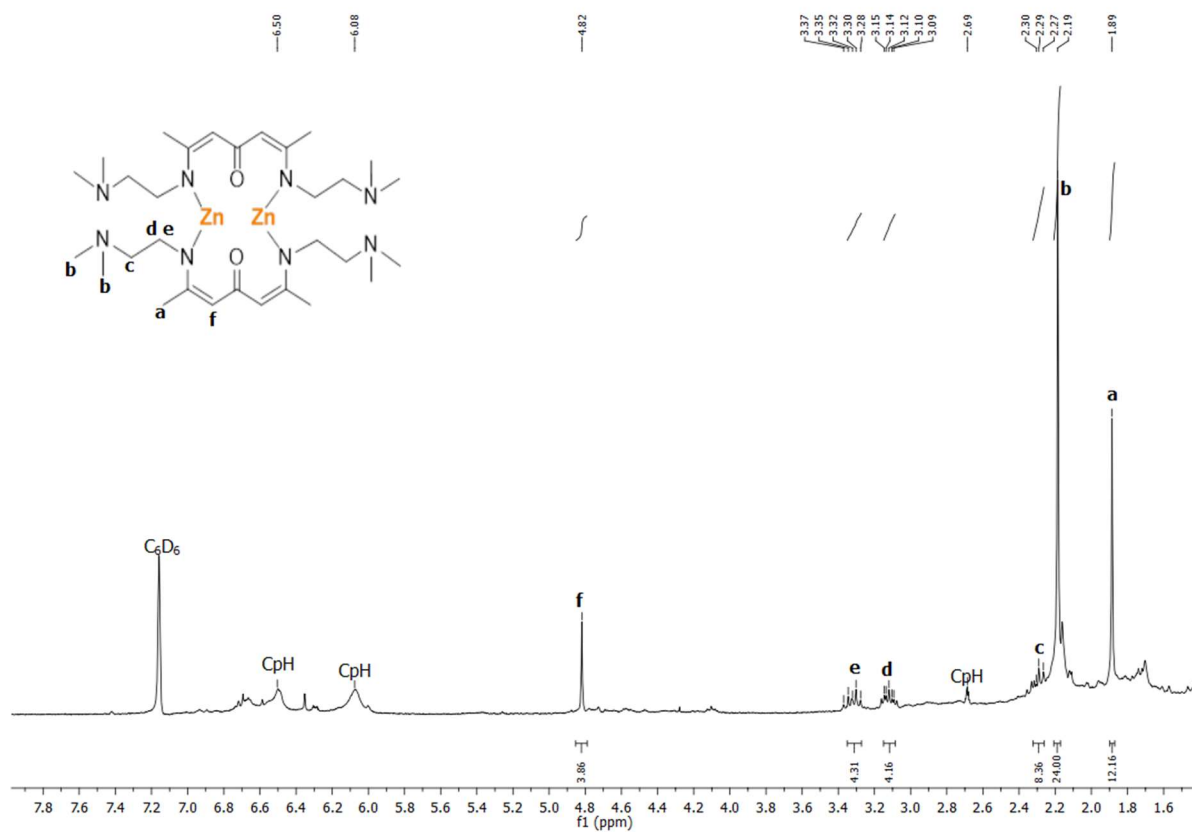

**Figure S8.**  $^1\text{H}$  NMR (300 MHz,  $\text{CD}_2\text{Cl}_2$ , 25  $^\circ\text{C}$ ) spectrum of the reaction of  $\text{L}^1\text{H}_2$  with 2 eq. of  $\text{ZnCp}_2$  yielding compound 1 and  $\text{Cp}^*\text{H}$ .

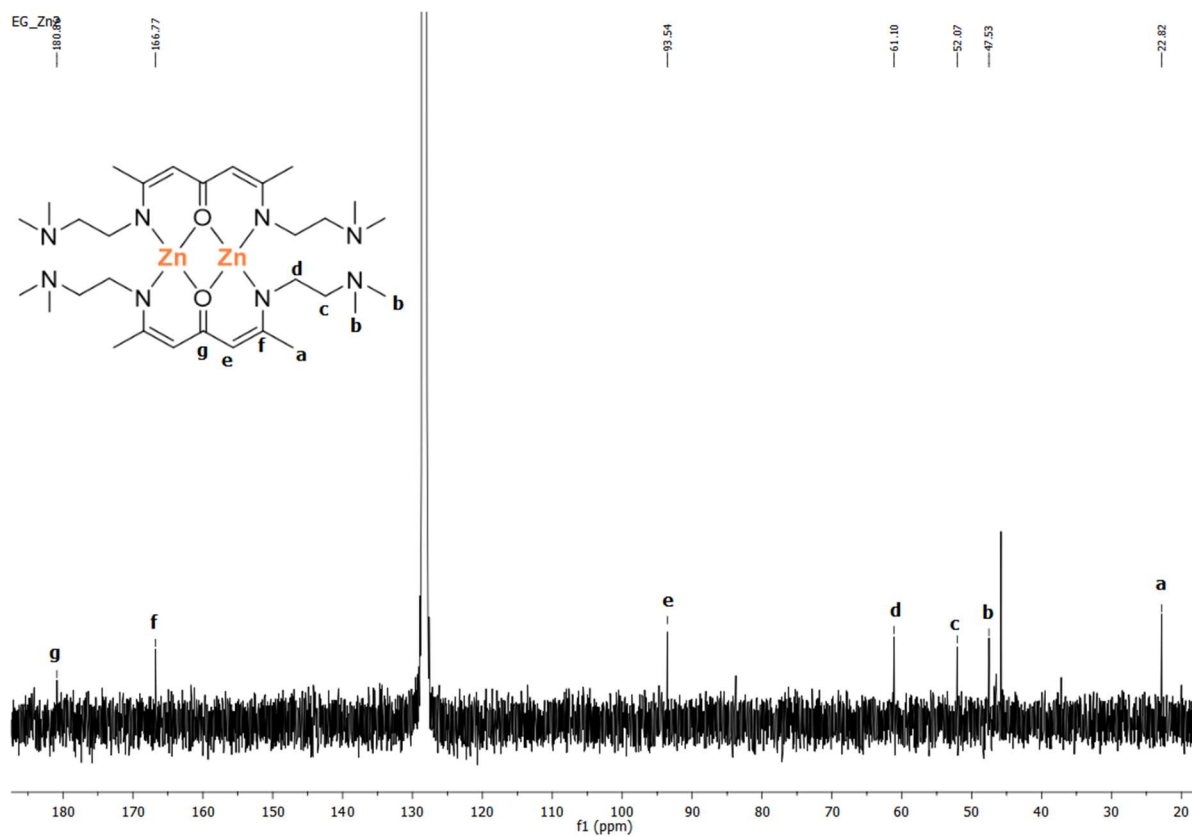

Figure S9.  $^{13}\text{C}$  NMR (75 MHz,  $\text{CD}_2\text{Cl}_2$ , 25 °C) spectrum of **1**.

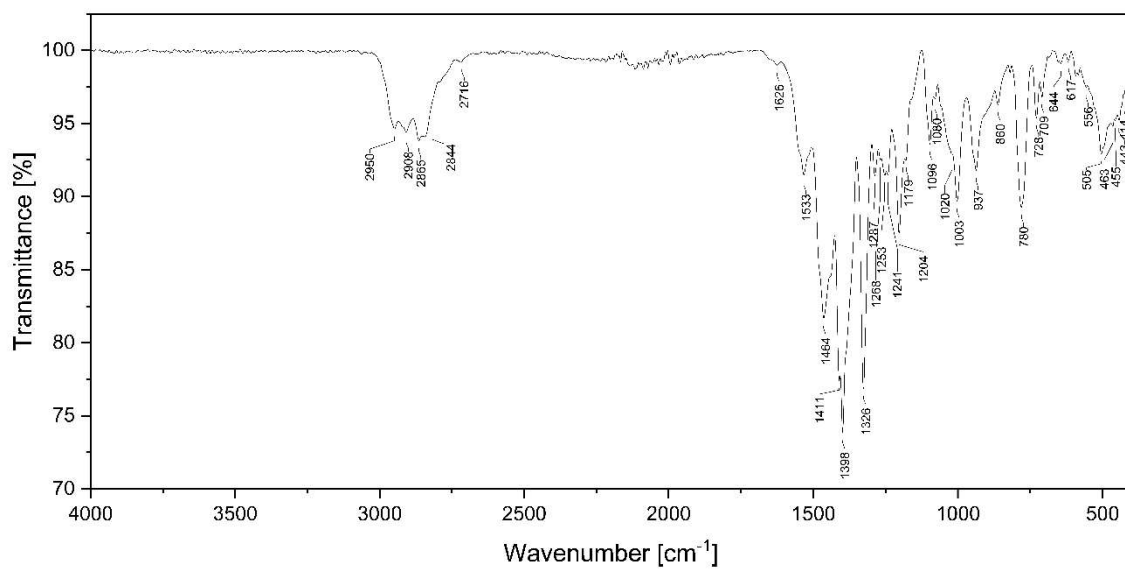

Figure S10. IR spectra of **1**.

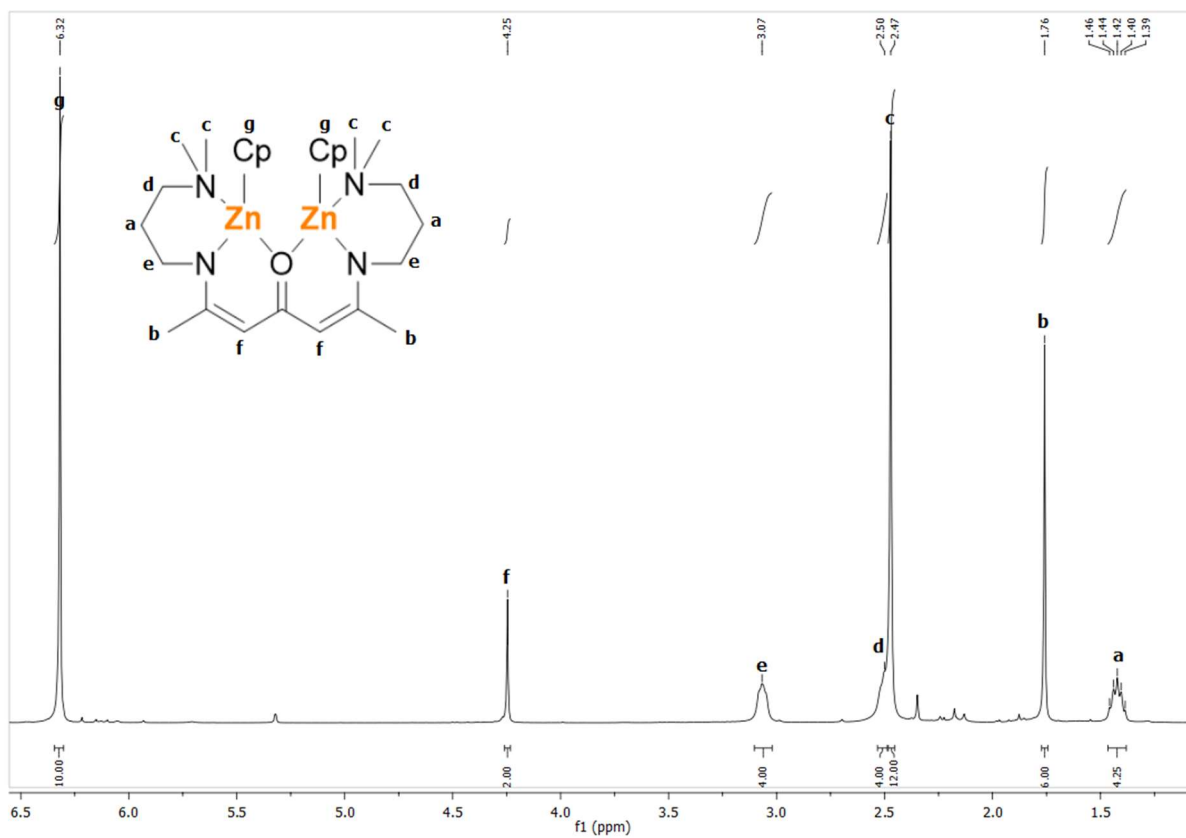

**Figure S11.** <sup>1</sup>H NMR (300 MHz, toluene-*d*<sub>8</sub>, 25 °C) spectrum of **2**.

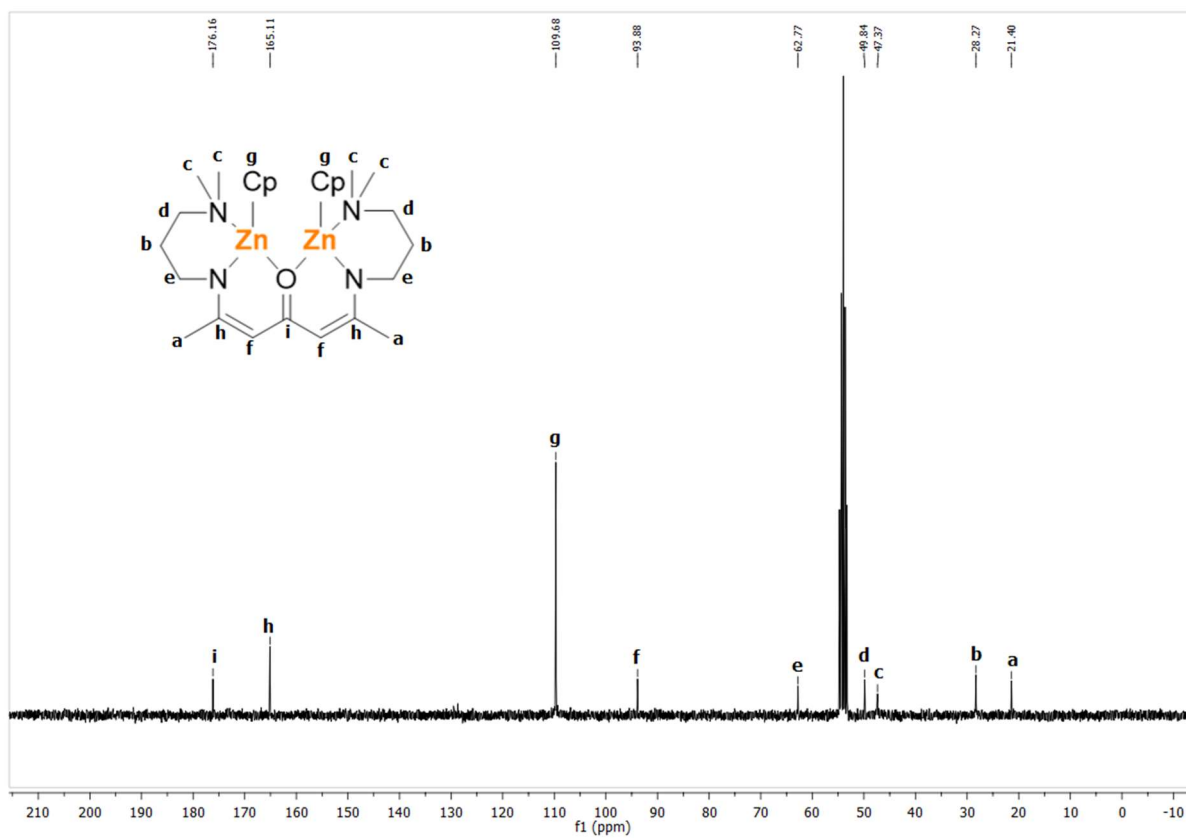

**Figure S12.** <sup>13</sup>C NMR (75 MHz, toluene-*d*<sub>8</sub>, 25 °C) spectrum of **2**.



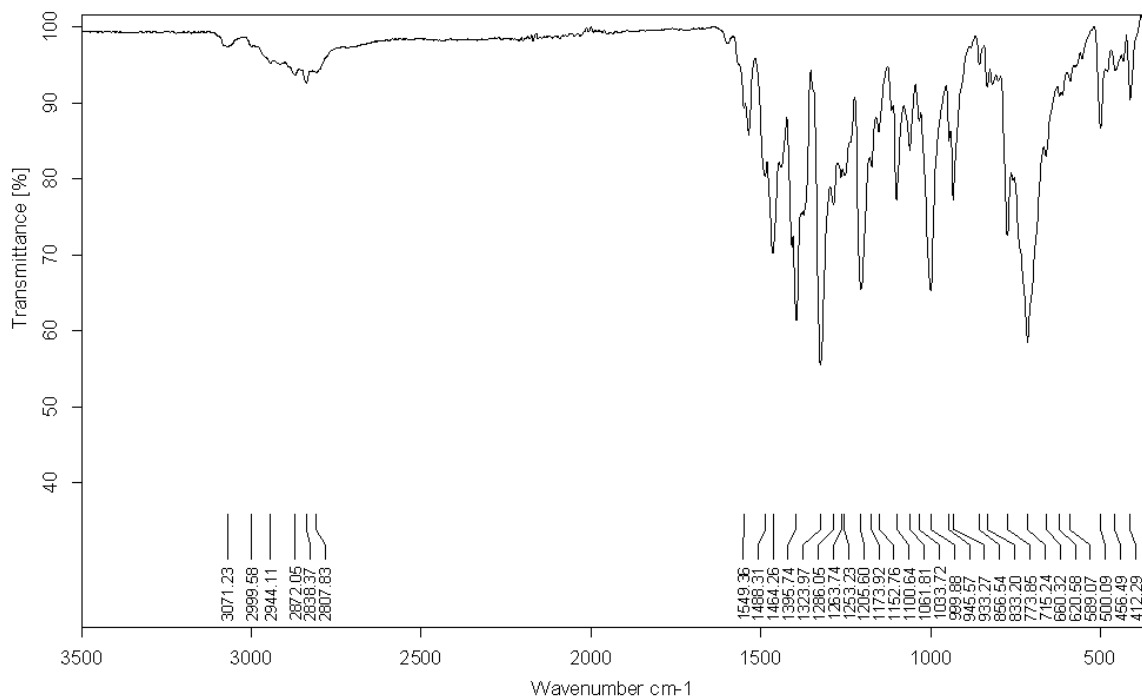

Figure S13. IR spectrum of **2**.

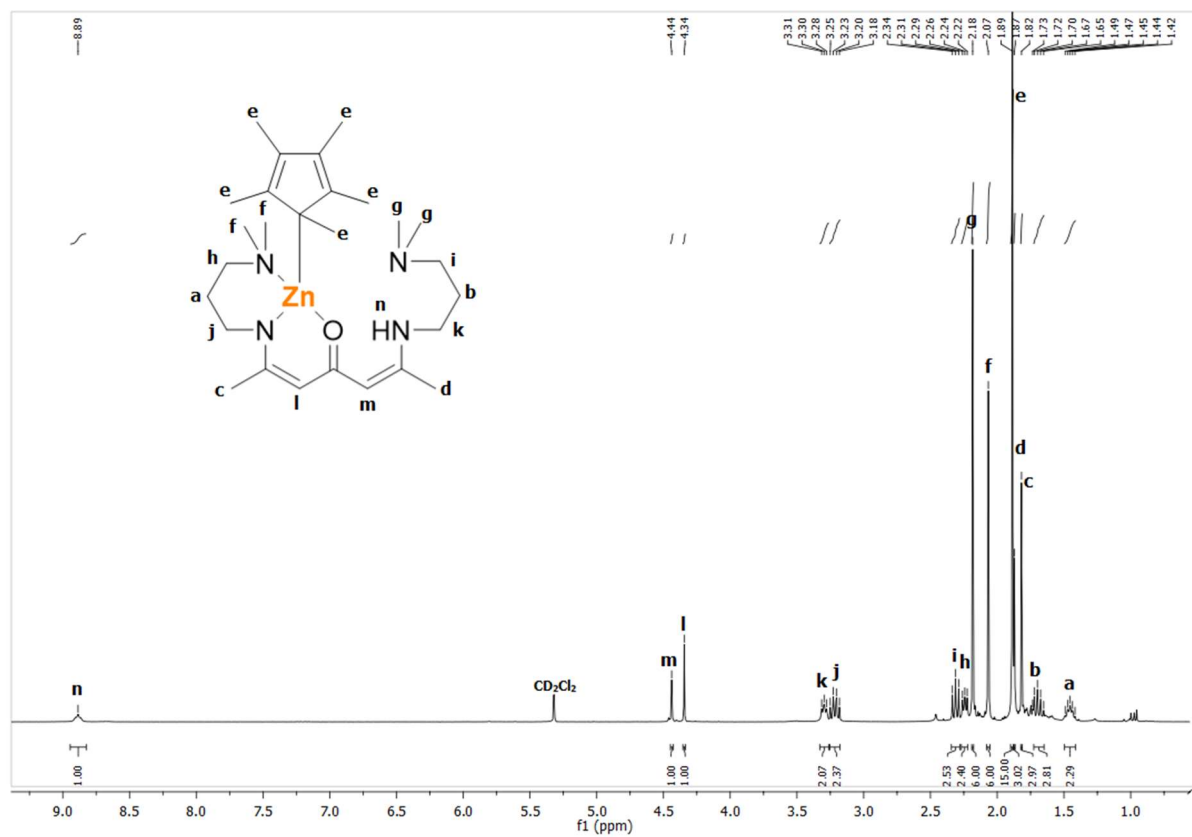

Figure S14. <sup>1</sup>H NMR (300 MHz, C<sub>6</sub>D<sub>6</sub>, 25 °C) spectrum of **3**.

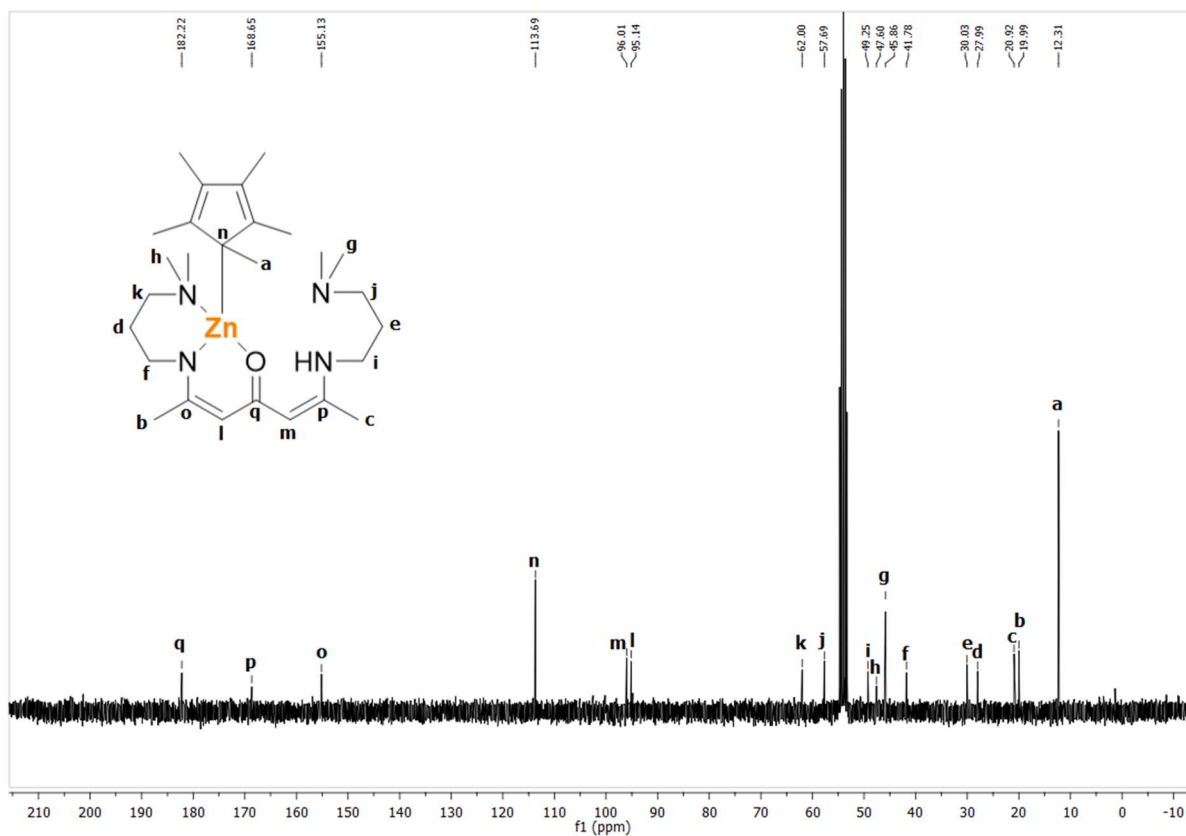

Figure S15.  $^{13}\text{C}$  NMR (75 MHz,  $\text{C}_6\text{D}_6$ , 25 °C) spectrum of **3**.

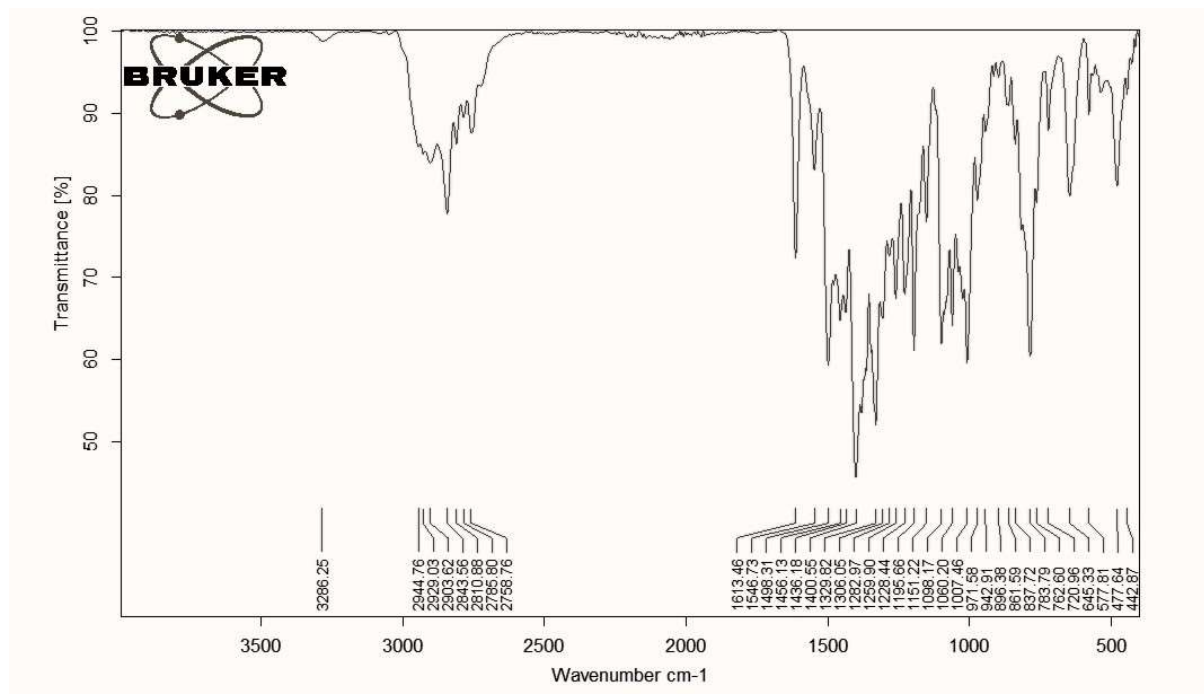

Figure S16. IR spectrum of **3**.

## II. Crystallographic Details

**Table S1** Crystal data for compounds **2** and **3**

| Compound                                                     | <b>2</b>                                                        | <b>3</b>                                           |
|--------------------------------------------------------------|-----------------------------------------------------------------|----------------------------------------------------|
| Empirical formula                                            | C <sub>27</sub> H <sub>42</sub> N <sub>4</sub> OZn <sub>2</sub> | C <sub>27</sub> H <sub>48</sub> N <sub>4</sub> OZn |
| Formula weight (Da)                                          | 569.38                                                          | 510.06                                             |
| <i>T</i> (K)                                                 | 100(2)                                                          | 100(2)                                             |
| Wavelength (Å)                                               | 0.71073                                                         | 1.54178                                            |
| Crystal system                                               | triclinic                                                       | triclinic                                          |
| Space group                                                  | <i>P</i> -1                                                     | <i>P</i> -1                                        |
| <i>a</i> /Å                                                  | 7.9884(6)                                                       | 8.0513(4)                                          |
| <i>b</i> /Å                                                  | 8.0941(7)                                                       | 12.3749(6)                                         |
| <i>c</i> /Å                                                  | 22.3164(18)                                                     | 14.7581(7)                                         |
| $\alpha$ (°)                                                 | 98.388(4)                                                       | 81.3299(17)                                        |
| $\beta$ (°)                                                  | 95.725(4)                                                       | 81.6550(17)                                        |
| $\gamma$ (°)                                                 | 106.622(4)                                                      | 74.9858(17)                                        |
| <i>V</i> (Å <sup>3</sup> )                                   | 1352.54(19)                                                     | 1395.29(12)                                        |
| <i>Z</i> , Calc. density (g cm <sup>-3</sup> )               | 2, 1.398                                                        | 2, 1.214                                           |
| Abs. coefficient (mm <sup>-1</sup> )                         | 1.799                                                           | 1.397                                              |
| Crystal size (mm)                                            | 0.255 × 0.119 × 0.05                                            | 0.263 × 0.087 × 0.075                              |
| Theta range for data collection (°)                          | 2.664°-33.268°                                                  | 3.048°-79.538°                                     |
| Reflections collected                                        | 92625                                                           | 71276                                              |
| Independent reflections                                      | 10387                                                           | 5871                                               |
| Data/restraints/parameters                                   | 10387/0/313                                                     | 5871/52/362                                        |
| Goodness-of-fit on <i>F</i> <sup>2</sup>                     | 1.040                                                           | 1.062                                              |
| Final <i>R</i> indices [ <i>I</i> > 2 $\sigma$ ( <i>I</i> )] | <i>R</i> 1 = 0.029                                              | <i>R</i> 1 = 0.038                                 |
|                                                              | <i>wR</i> 2 = 0.064                                             | <i>wR</i> 2 = 0.099                                |
| <i>R</i> indices (all data)                                  | <i>R</i> 1 = 0.0406                                             | <i>R</i> 1 = 0.0421                                |
|                                                              | <i>wR</i> 2 = 0.0679                                            | <i>wR</i> 2 = 0.1040                               |

### III. Polymerization Studies

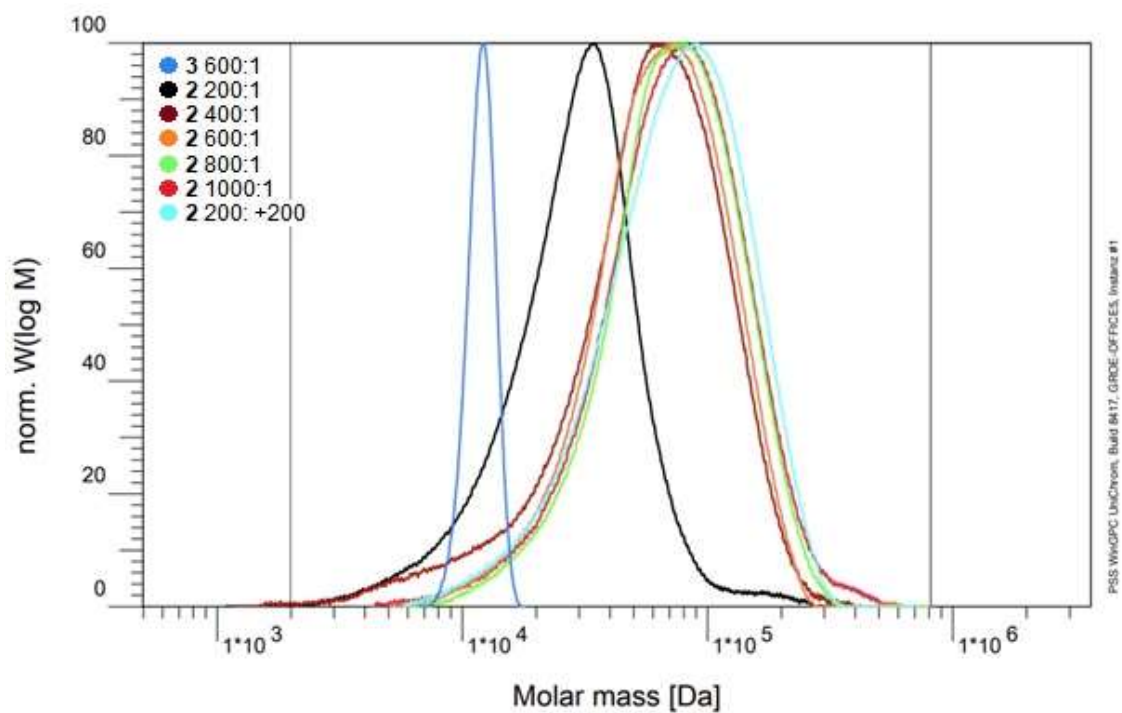

Figure S17. MWDs of cPLA obtained by reaction of L-LA and 2 and 3.

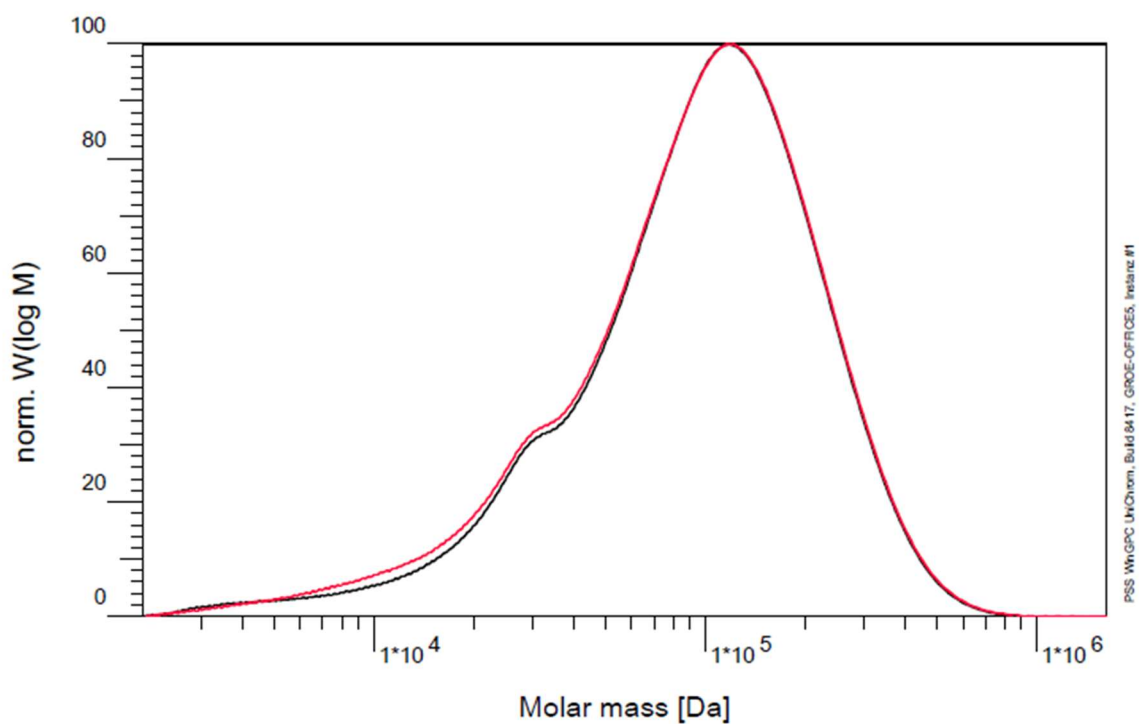

Figure S18. MWDs of cPLA obtained by reaction of L-LA and complex 2 (200:1+200+200).

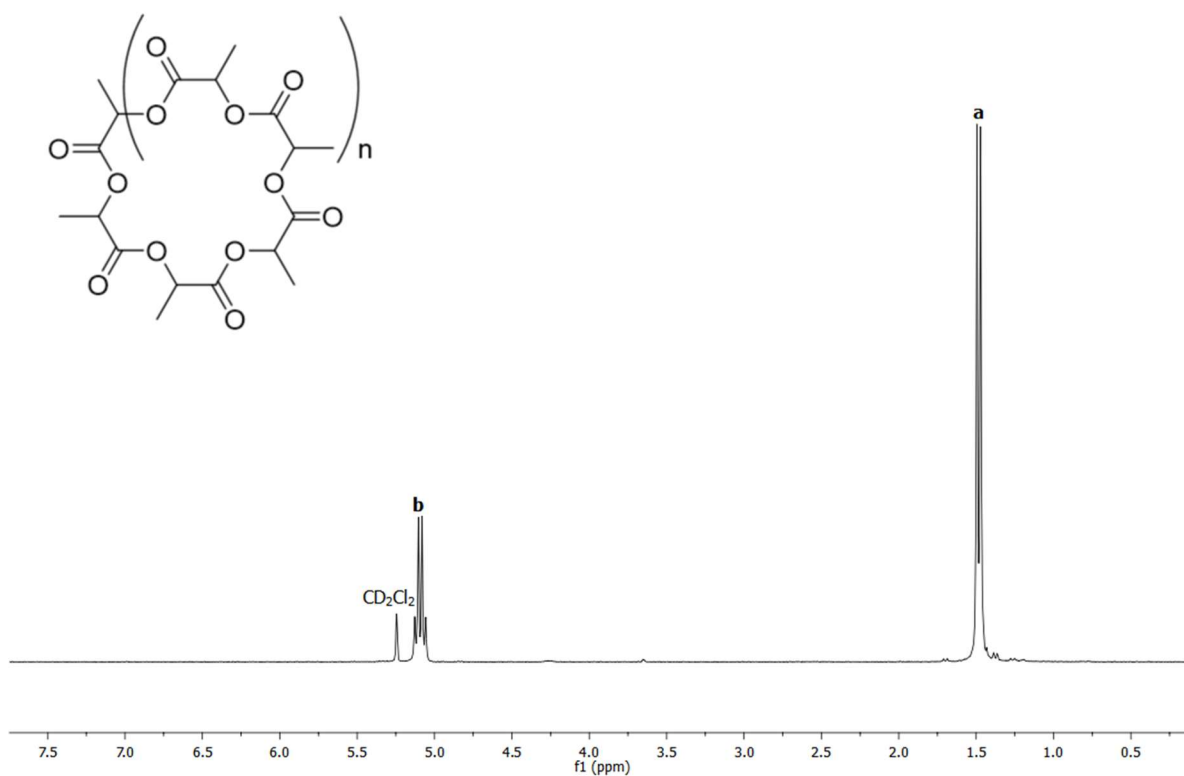

**Figure S19.** <sup>1</sup>H NMR (300 MHz, C<sub>6</sub>D<sub>6</sub>, 25 °C) spectrum of cPLA obtained by reaction of *L*-LA and **2** in ratio [monomer]:[Zn] = 200:1 at 100 °C in toluene.

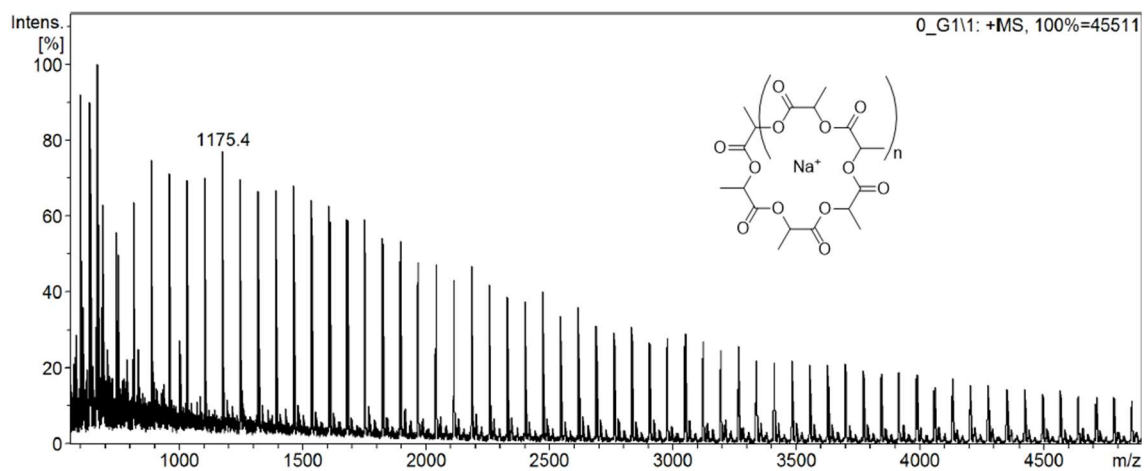

**Figure S20.** MALDI-ToF spectrum of cyclic-PLLA obtained by reaction of *L*-LA and **2** in ratio [monomer]:[Zn] = 50:1 at 100 °C in toluene.

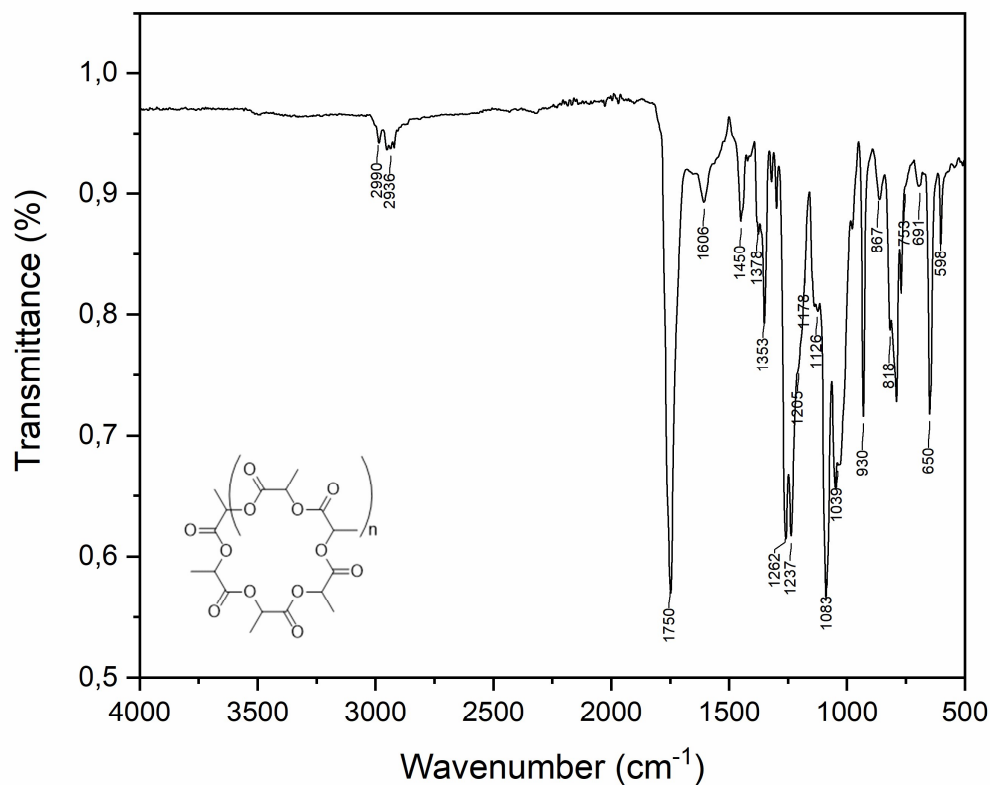

**Figure S21.** IR spectrum of cyclic-PLLA obtained by reaction of *L*-LA and **2** in ratio [monomer]:[Zn] = 50:1 at 100 °C in toluene.

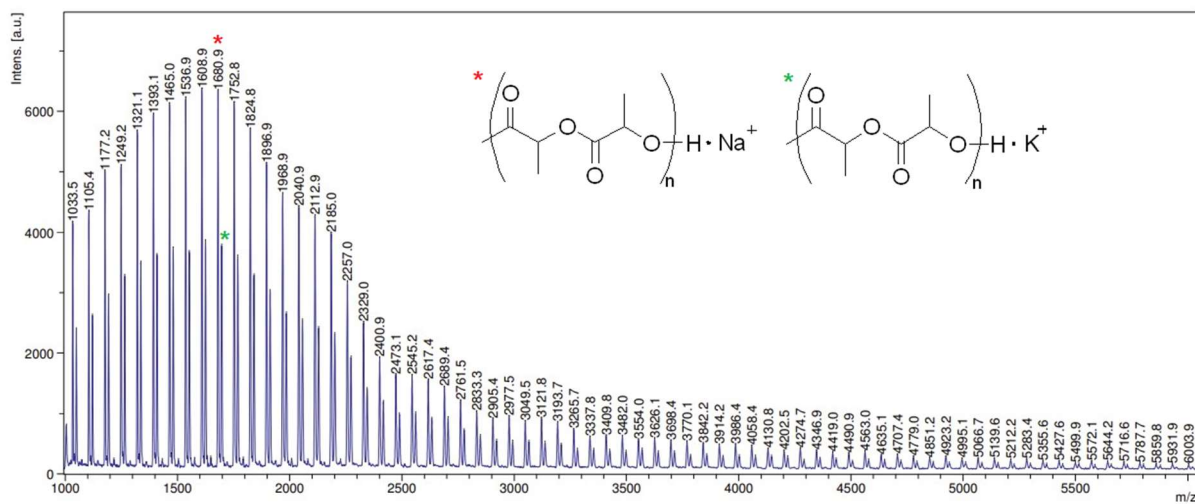

**Figure S22.** MALDI-ToF spectrum of linear PLLA obtained by reaction of *L*-LA and **3** in ratio [monomer]:[Zn] = 50:1 at 100 °C in toluene.

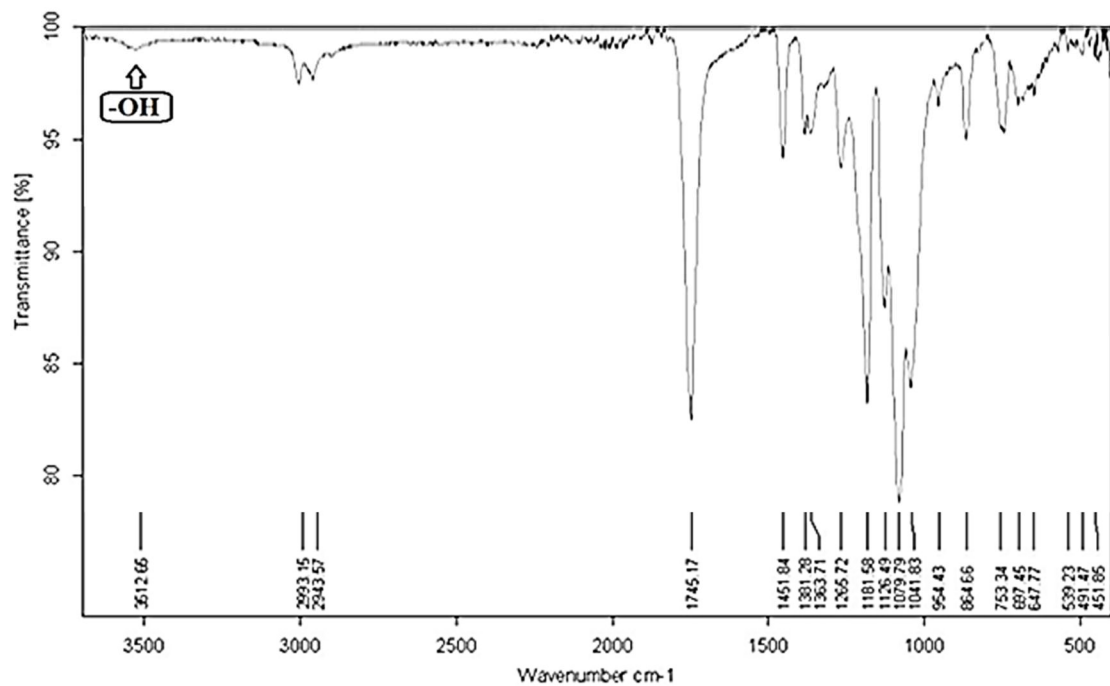

**Figure S23.** IR spectrum of linear PLLA obtained by reaction of *L*-LA and **3** in ratio [monomer]:[Zn] = 50:1 at 100 °C in toluene.
